# Supplementary material for: Use of Multiple Biomarkers to Improve the Prediction of Death from Cardiovascular Causes
Source: Atypon-hosted journal article supplement (doi:10.1056/nejmoa0707064), 2008-05-14
Supplement: nejm_zethelius_2107sa1.pdf [file nejm_zethelius_2107sa1.pdf]

## Supplementary Appendix

This appendix has been provided by the authors to give readers additional information about their work.

Supplement to: Zethelius B, Berglund L, Sundström J, et al. Use of multiple biomarkers to improve the prediction of death from cardiovascular causes. *N Engl J Med* 2008;358:2107-16.

**Supplementary Table 1** The crude associations of the established risk factors and biomarkers to cardiovascular and total mortality in the whole sample (n=1135)

|                             | Cardiovascular mortality  |             |                        | All-cause mortality       |             |                        |
|-----------------------------|---------------------------|-------------|------------------------|---------------------------|-------------|------------------------|
|                             | Hazard ratio<br>(95 % CI) | C-statistic | Calibration $\chi^2$ § | Hazard ratio<br>(95 % CI) | C-statistic | Calibration $\chi^2$ § |
| <b>Basic Model</b>          |                           |             |                        |                           |             |                        |
| Age                         | 1.23 (1.03-1.47)*         | 0.524       | 4.27                   | 1.10 (0.98-1.24)          | 0.521       | 7.57                   |
| Systolic blood pressure     | 1.32 (1.12-1.55)‡         | 0.587‡      | 3.90                   | 1.17 (1.06-1.31)†         | 0.543*      | 4.18                   |
| Anti hypertensive treatment | 1.89 (1.35-2.65)‡         | 0.568†      | -                      | 1.34 (1.08-1.69)†         | 0.530*      | -                      |
| Total Cholesterol           | 0.99 (0.84-1.18)          | 0.507       | 2.62                   | 0.96 (0.86-1.07)          | 0.515       | 6.24                   |
| HDL-cholesterol             | 0.75 (0.62-0.91)†         | 0.591‡      | 3.12                   | 0.83 (0.74-0.94)†         | 0.554†      | 4.43                   |
| Lipid Lowering treatment    | 1.09 (0.63-1.90)          | 0.500       | -                      | 0.89 (0.60-1.32)          | 0.507       | -                      |
| Diabetes                    | 2.35 (1.54-3.59)‡         | 0.553†      | -                      | 1.93 (1.44-2.60)‡         | 0.537‡      | -                      |
| Smoking status              | 1.85 (1.29-2.66)‡         | 0.564†      | -                      | 1.64 (1.28-2.09)‡         | 0.546‡      | -                      |
| Body mass index             | 1.31 (1.13-1.53)‡         | 0.572*      | 4.78                   | 1.16 (1.04-1.99)†         | 0.524       | 6.93                   |
| <b>Biomarkers</b>           |                           |             |                        |                           |             |                        |
| Troponin I                  | 1.67 (1.48-1.88)‡         | 0.637‡      | 0.40                   | 1.40 (1.27-1.54)‡         | 0.580‡      | 1.34                   |
| NT-proBNP                   | 2.05 (1.76-2.39)‡         | 0.706‡      | 1.11                   | 1.58 (1.42-1.76)‡         | 0.625‡      | 4.21                   |
| Cystatin C                  | 1.52 (1.33-1.74)‡         | 0.632‡      | 3.79                   | 1.37 (1.24-1.51)‡         | 0.589‡      | 2.75                   |
| CRP                         | 1.61 (1.36-1.91)‡         | 0.639‡      | 1.24                   | 1.47 (1.32-1.64)‡         | 0.606‡      | 6.34                   |

Data for continuous variables (age, systolic blood pressure, total cholesterol, HDL-cholesterol, body mass index, Troponin I, NT-proBNP, Cystatin C and CRP) is expressed as the hazard ratio for 1 standard deviation (SD) increase. \* p<0.05, † p<0.01, ‡ p<0.001.

A significant value for calibration  $\chi^2$  indicates a significant deviation between predicted and observed outcomes. § The calibration  $\chi^2$  statistic is not applicable for a model with only one dichotomous predictor

**Supplementary Table 2** The multivariable association of different combinations of elevated biomarkers for the prediction of cardiovascular mortality in the whole cohort (n=1135)

| <b>Biomarker combinations</b>          | <b>Number of elevated biomarkers</b> | <b>Number of events /numbers at risk</b> | <b>Hazard ratio (95 % CI)</b> |
|----------------------------------------|--------------------------------------|------------------------------------------|-------------------------------|
| <b><u>2-biomarker combinations</u></b> |                                      |                                          |                               |
| Cystatin C/CRP                         | 0                                    | 42/567                                   | referent                      |
|                                        | 1                                    | 53/413                                   | 1.66 (1.10-2.51)*             |
|                                        | 2                                    | 41/155                                   | 3.32 (2.11-5.22)‡             |
| Cystatin C/Troponin I                  | 0                                    | 53/705                                   | referent                      |
|                                        | 1                                    | 60/381                                   | 1.99 (1.36-2.90)‡             |
|                                        | 2                                    | 23/49                                    | 6.71 (4.00-11.23)‡            |
| Cystatin C/NT-proBNP                   | 0                                    | 48/699                                   | referent                      |
|                                        | 1                                    | 56/347                                   | 2.37 (1.60-3.51)‡             |
|                                        | 2                                    | 32/89                                    | 5.21 (3.20-8.51)‡             |
| CRP/ Troponin I                        | 0                                    | 53/708                                   | referent                      |
|                                        | 1                                    | 63/378                                   | 2.22 (1.53-3.22)‡             |
|                                        | 2                                    | 20/50                                    | 5.80 (3.39-9.90)‡             |
| CRP/ NT-proBNP                         | 0                                    | 46/685                                   | referent                      |
|                                        | 1                                    | 63/376                                   | 2.39 (1.62-3.53)‡             |
|                                        | 2                                    | 27/74                                    | 5.91 (3.60-9.70)‡             |
| NT-proBNP/ Troponin I                  | 0                                    | 73/904                                   | referent                      |
|                                        | 1                                    | 38/182                                   | 2.66 (1.78-3.98)‡             |
|                                        | 2                                    | 25/49                                    | 7.07 (4.39-11.38)‡            |
| <b><u>3-biomarker combinations</u></b> |                                      |                                          |                               |
| Cystatin C/CRP/Troponin I              | 0                                    | 34/524                                   | referent                      |
|                                        | 1                                    | 46/407                                   | 1.70 (1.08-2.67)*             |
|                                        | 2                                    | 42/179                                   | 3.55 (2.22-5.68)‡             |
|                                        | 3                                    | 14/25                                    | 9.83 (5.06-19.09)‡            |
| Cystatin C/CRP/ NT-proBNP              | 0                                    | 30/516                                   | referent                      |
|                                        | 1                                    | 46/403                                   | 1.99 (1.25-3.17)†             |
|                                        | 2                                    | 40/165                                   | 3.89 (2.37-6.38)‡             |
|                                        | 3                                    | 20/51                                    | 7.57 (4.18-13.70)‡            |
| Cystatin C/ NT-proBNP/ Troponin I      | 0                                    | 41/653                                   | referent                      |
|                                        | 1                                    | 51/349                                   | 2.31 (1.52-3.51)†             |
|                                        | 2                                    | 26/106                                   | 4.27 (2.57-7.09)‡             |
|                                        | 3                                    | 18/27                                    | 11.87 (6.44-21.86)‡           |
| CRP/ NT-proBNP/ Troponin I             | 0                                    | 40/642                                   | referent                      |
|                                        | 1                                    | 52/370                                   | 2.22 (1.46-3.73)‡             |
|                                        | 2                                    | 30/98                                    | 5.12 (3.14-8.33)‡             |
|                                        | 3                                    | 14/25                                    | 11.12 (5.84-21.17)‡           |
| <b><u>4-biomarker combination</u></b>  |                                      |                                          |                               |
| Cystatin C/CRP/Troponin I/ NT-proBNP   | 0                                    | 26/486                                   | referent                      |
|                                        | 1                                    | 41/391                                   | 1.98 (1.20-3.25)†             |
|                                        | 2                                    | 36/178                                   | 3.69 (2.19-6.20)‡             |
|                                        | 3                                    | 22/64                                    | 7.19 (3.98-13.00)‡            |
|                                        | 4                                    | 11/16                                    | 16.57 (7.70-35.68)‡           |

All models are adjusted for age at baseline (continuous), systolic blood pressure (continuous), Antihypertensive treatment (binary), Total cholesterol (continuous), HDL-cholesterol (continuous), lipid lowering treatment (binary), diabetes (binary), smoking status and body mass index (continuous). Cut-offs for biomarkers: Cystatin C  $\geq 1.29$  mg/l, CRP  $> 3$  mg/l, Troponin I  $> 0.021$   $\mu$ g/l and NT-proBNP  $\geq 386$  ng/l, \* p<0.05, † p<0.01, ‡ p<0.001

**Supplementary Table 3** The improvement in model discrimination when adding single biomarkers or different 2- and 3-combinations of the biomarkers to a model with establish risk factors for the prediction of cardiovascular mortality in participants without CVD at baseline (n=661)

|                                        |                                  | <b>Discrimination</b> |            |            |
|----------------------------------------|----------------------------------|-----------------------|------------|------------|
|                                        |                                  | <b>C-statistic</b>    | <b>NRI</b> | <b>IDI</b> |
|                                        | Basic model                      | 0.688                 | referent   | referent   |
| <b><u>Single biomarkers</u></b>        | Troponin I                       | 0.717                 | 0.15*      | 0.043*     |
|                                        | NT-proBNP                        | 0.722                 | 0.12       | 0.044‡     |
|                                        | Cystatin C                       | 0.700                 | -0.03      | 0.012      |
|                                        | CRP                              | 0.715                 | 0.10       | 0.013*     |
|                                        |                                  |                       |            |            |
| <b><u>2-biomarker combinations</u></b> | Cystatin C/CRP                   | 0.714                 | 0.05       | 0.020*     |
|                                        | Cystatin C/Troponin I            | 0.724                 | 0.14       | 0.052*     |
|                                        | Cystatin C/NT-proBNP             | 0.724                 | 0.15       | 0.046†     |
|                                        | CRP/ Troponin I                  | 0.734*                | 0.16*      | 0.048*     |
|                                        | CRP/ NT-proBNP                   | 0.734                 | 0.12       | 0.047‡     |
|                                        | NT-proBNP/ Troponin I            | 0.737                 | 0.21†      | 0.070†     |
| <b><u>3-biomarker combinations</u></b> | Cystatin C/CRP/Troponin I        | 0.734*                | 0.15       | 0.056†     |
|                                        | Cystatin C/CRP/ NT-proBNP        | 0.734                 | 0.18*      | 0.049‡     |
|                                        | Cystatin C/NT-proBNP/ Troponin I | 0.739                 | 0.20*      | 0.073†     |
|                                        | CRP/ NT-proBNP/ Troponin I       | 0.748*                | 0.24†      | 0.071‡     |

\* p<0.05, † p<0.01, ‡ p<0.001, for difference with Basic model: age at baseline (continuous), systolic blood pressure (continuous), antihypertensive treatment (binary), total cholesterol (continuous), HDL-cholesterol (continuous), lipid lowering treatment (binary), diabetes (binary), smoking status (binary) and body mass index (continuous).

Discrimination -how well the model can discriminate between those who will develop the disease of interest from those who will not. The ability of a risk marker to more accurately stratify individuals into higher or lower risk categories (reclassification) is investigated by Net Reclassification Improvement (NRI, categorical) and Integrated Discrimination Improvement (IDI, continuous)

The biomarkers were modeled as continuous variables
